# Supplementary material for: Moving from Rabies Research to Rabies Control: Lessons from India
Source: PLoS Negl Trop Dis. 2012 Aug 7;6(8):e1748. doi: 10.1371/journal.pntd.0001748 (PMC3413711; doi:10.1371/journal.pntd.0001748)
Supplement: File S2 — List of rabies research articles from India (2001–11). (XLS) [file pntd.0001748.s002.xls]

## Sheet: Sheet1
PMID	Title	Authors	Journal	First_Author	Pub_Year	IHR	Avenue	Factorial	Journal_Type	Setting	Commodity	Sector	Institution	City	Pub_Details	Date_Created	Exclusion
15117129	Epidemiology of dog bites: a community-based study in India.	Agarwal N, Reddajah VP.	Trop Doct	Agarwal N	2004	IHR1	A	4	Human	Rural community-based	Human	Human	AIIMS	Delhi	Trop Doct. 2004 Apr;34(2):76-8.	38108	No
11472431	Selection of single chain variable fragments (scFv) against the glycoprotein antigen of the rabies virus from a human synthetic scFv phage display library and their fusion with the Fc region of human IgG1.	Ray K, Embleton MJ, Jailkhani BL, Bhan MK, Kumar R.	Clin Exp Immunol	Ray K	2001	IHR4	I	1	Human	Lab-based	Pathogen	Human	AIIMS	Delhi	Clin Exp Immunol. 2001 Jul;125(1):94-101.	37099	No
19008160	Chromatographic purification of equine immunoglobulin G F(ab)2 from plasma.	Fernandes A, Kaundinya JO, Daftary G, Saxena L, Banerjee S, Pattnaik P.	J Chromatogr B Analyt Technol Biomed Life Sci	Fernandes A	2008	IHR4	I	1	General	Lab-based	Pathogen	General	Bharat Serum and Vaccines Ltd	Thane	J Chromatogr B Analyt Technol Biomed Life Sci. 2008 Dec 1;876(1):109-15. Epub 2008 Nov 1.	39767	No
21031120	Intradermal cell culture rabies vaccine: a cost effective option in antirabies treatment.	Rahim A, Kuppuswamy K, Thomas B, Raphael L.	Indian J Community Med	Rahim A	2010	IHR3	G	4	Human	Clinical/Facility-based	Human	Human	Calicut Medical College	Kozhikode	Indian J Community Med. 2010 Jul;35(3):443-4. No abstract available.	40481	No
18848596	Post-exposure prophylaxis (PEP) of rabies-infected Indian street dogs.	Manickama R, Basheer MD, Jayakumar R.	Vaccine	Manickama R	2008	IHR4	J	1	General	Clinical/Facility-based	Dog	Animal	Center for Animal Health Studies	Chennai	Vaccine. 2008 Dec 2;26(51):6564-8.	39735	No
21452061	Molecular characterization of Indian rabies virus isolates by partial sequencing of nucleoprotein (N) and phosphoprotein (P) genes.	Reddy GB, Singh R, Singh RP, Singh KP, Gupta PK, Desai A, Shankar SK, Ramakrishnan MA, Verma R.	Virus Genes	Reddy GB	2011	IHR1	A	1	General	Lab-based	Pathogen	Animal	Central Institute for Research on Goats	Mathura	Virus Genes. 2011 Aug;43(1):13-7. Epub 2011 Mar 31.	40634	No
14624792	Antibody response to purified chick embryo cell vaccine in equines for production of equine rabies immune globulin.	Goel SK, Sharma S, Singh US.	Biologicals	Goel SK	2003	IHR4	I	1	General	Lab-based	Pathogen	Human	Central Research Institute	Kasauli	Biologicals. 2003 Dec;31(4):233-6.	37945	No
16483026	Effect of different adjuvants in equines for the production of equine rabies immunoglobulin.	Arora S, Sharma S, Goel SK, Singh US.	Natl Med J India	Arora S	2005	IHR4	I	1	Human	Lab-based	Pathogen	Human	Central Research Institute	Kasauli	Natl Med J India. 2005 Nov-Dec;18(6):289-92.	38766	No
15712086	Immunogenicity of purified vero cell rabies vaccine used in the treatment of fox-bite victims in India.	Matha IS, Salunke SR.	Clin Infect Dis	Matha IS	2005	IHR1	C	1	Human	Clinical/Facility-based	Human	Human	District Hospital	Nashik	Clin Infect Dis. 2005 Feb 15;40(4):611-3. Epub 2005 Jan 26.	38399	No
21218060	Molecular docking studies with rabies virus glycoprotein to design viral therapeutics.	Tomar NR, Singh V, Marla SS, Chandra R, Kumar R, Kumar A.	Indian J Pharm Sci	Tomar NR	2010	IHR4	I	1	General	Lab-based	Pathogen	Animal	G. B. Pant University of Agriculture and Technology	Pantnagar	Indian J Pharm Sci. 2010 Jul;72(4):486-90.	40554	No
21870427	Expression of rabies virus glycoprotein gene into eukaryotic system and determination of potential T-cell epitopes.	Tomar NR, Chandra R, Kumar R, Tiwari AK, Kumar A.	Indian J Exp Biol	Tomar NR	2011	IHR4	I	1	General	Lab-based	Pathogen	Animal	G. B. Pant University of Agriculture and Technology	Pantnagar	Indian J Exp Biol. 2011 Aug;49(8):594-9.	40785	No
18634472	Rabies in South Asia: epidemiological investigations and clinical perspective.	Singh CK, Sandhu BS.	Dev Biol (Basel)	Singh CK	2008	IHR1	A	4	General	Urban-Rural (mixed) community-based	Multiple Animals	Animal	GADVASU	Ludhiana	Dev Biol (Basel). 2008;131:133-6.	39648	No
11993976	Timing of oestrus and reproductive behaviour in Indian street dogs.	Chawla SK, Reece JF.	Vet Rec	Chawla SK	2002	IHR1	B	1	Animal	Urban community-based	Dog	Animal	Help in Suffering	Jaipur	Vet Rec. 2002 Apr 6;150(14):450-1. No abstract available.	37384	No
16980523	Control of rabies in Jaipur, India, by the sterilisation and vaccination of neighbourhood dogs.	Reece JF, Chawla SK.	Vet Rec	Reece JF	2006	IHR1	C	4	Animal	Urban community-based	Dog	Animal	Help in Suffering	Jaipur	Vet Rec. 2006 Sep 16;159(12):379-83. Erratum in: Vet Rec. 2006 Sep 23;159(13):414.	38979	No
11589833	Preexposure efficacy of a novel combination DNA and inactivated rabies virus vaccine.	Biswas S, Reddy GS, Srinivasan VA, Rangarajan PN.	Hum Gene Ther	Biswas S	2001	IHR4	I	1	General	Lab-based	Pathogen	General	IISc	Bangalore	Hum Gene Ther. 2001 Oct 10;12(15):1917-22.	37173	No
12810866	Common host genes are activated in mouse brain by Japanese encephalitis and rabies viruses.	Saha S, Rangarajan PN.	J Gen Virol	Saha S	2003	IHR1	B	1	General	Lab-based	Pathogen	General	IISc	Bangalore	J Gen Virol. 2003 Jul;84(Pt 7):1729-35.	37790	No
16760401	Identification and characterization of a virus-inducible non-coding RNA in mouse brain.	Saha S, Murthy S, Rangarajan PN.	J Gen Virol	Saha S	2006	IHR4	I	1	General	Lab-based	Pathogen	General	IISc	Bangalore	J Gen Virol. 2006 Jul;87(Pt 7):1991-5.	38877	No
20211624	Identification of protein interaction regions of VINC/NEAT1/Men epsilon RNA.	Murthy UM, Rangarajan PN.	FEBS Lett	Murthy UM	2010	IHR4	I	1	General	Lab-based	Pathogen	General	IISc	Bangalore	FEBS Lett. 2010 Apr 16;584(8):1531-5. Epub 2010 Mar 6.	40247	No
12562014	Evaluation of rabies virus neutralizing antibody titres induced by intramuscular inoculation of rabies DNA vaccine in mice and Bonnet monkeys (Macaca radiata).	Biswas S, Kalanidhi AP, Ashok MS, Reddy GS, Srinivasan VA, Rangarajan PN.	Indian J Exp Biol	Biswas S	2001	IHR4	I	1	General	Lab-based	Pathogen	General	IISc	Bangalore	Indian J Exp Biol. 2001 Jun;39(6):533-6.	37656	No
16084736	Validation of the inactivant binary ethylenimine for inactivating rabies virus for veterinary rabies vaccine production.	Mondal SK, Neelima M, Seetha Rama Reddy K, Ananda Rao K, Srinivasan VA.	Biologicals	Mondal SK	2005	IHR4	I	1	General	Lab-based	Pathogen	Animal	Indian Immunologicals Limited	Hyderabad	Biologicals. 2005 Sep;33(3):185-9.	38573	No
16188454	A simple immuno-capture ELISA to estimate rabies viral glycoprotein antigen in vaccine manufacture.	Nagarajan T, Reddy GS, Mohana Subramanian B, Rajalakshmi S, Thiagarajan D, Tordo N, Jallet C, Srinivasan VA.	Biologicals	Nagarajan T	2006	IHR4	I	1	General	Lab-based	Pathogen	Animal	Indian Immunologicals Limited	Hyderabad	Biologicals. 2006 Mar;34(1):21-7. Epub 2005 Sep 26.	38624	No
16954251	Molecular epidemiology of rabies virus isolates in India.	Nagarajan T, Mohanasubramanian B, Seshagiri EV, Nagendrakumar SB, Saseendranath MR, Satyanarayana ML, Thiagarajan D, Rangarajan PN, Srinivasan VA.	J Clin Microbiol	Nagarajan T	2006	IHR1	A	1	General	Lab-based	Pathogen	Animal	Indian Immunologicals Limited	Hyderabad	J Clin Microbiol. 2006 Sep;44(9):3218-24.	38967	No
19428313	Phylogenetic analysis of nucleoprotein gene of dog rabies virus isolates from Southern India.	Nagarajan T, Nagendrakumar SB, Mohanasubramanian B, Rajalakshmi S, Hanumantha NR, Ramya R, Thiagarajan D, Srinivasan VA.	Infect Genet Evol	Nagarajan T	2009	IHR1	A	1	General	Lab-based	Pathogen	Animal	Indian Immunologicals Limited	Hyderabad	Infect Genet Evol. 2009 Sep;9(5):976-82. Epub 2009 Apr 15.	39945	No
20573881	Recombinant diabody-based immunocapture enzyme-linked immunosorbent assay for quantification of rabies virus glycoprotein.	Nimmagadda SV, Aavula SM, Biradhar N, Rao VS, Shanmugham R, Chandran D, Thirumeni N, Singanallur NB, Villuppanoor SA.	Clin Vaccine Immunol	Nimmagadda SV	2010	IHR4	I	1	Human	Lab-based	Pathogen	Animal	Indian Immunologicals Limited	Hyderabad	Clin Vaccine Immunol. 2010 Aug;17(8):1261-8. Epub 2010 Jun 23.	40354	No
21813661	Expression and solubilization of insect cell-based rabies virus glycoprotein and assessment of its immunogenicity and protective efficacy in mice.	Ramya R, Mohana Subramanian B, Sivakumar V, Senthilkumar RL, Sambasiva Rao KR, Srinivasan VA.	Clin Vaccine Immunol	Ramya R	2011	IHR4	I	1	General	Lab-based	Pathogen	Animal	Indian Immunologicals Limited	Hyderabad	Clin Vaccine Immunol. 2011 Oct;18(10):1673-9. Epub 2011 Aug 3.	40817	No
22007309	Generation and Characterization of an scFv Directed against Site II of Rabies Glycoprotein.	Aavula SM, Nimmagadda SV, Biradhar N, Sula S, Chandran D, Lingala R, Villuppanoor SA.	Biotechnol Res Int	Aavula SM	2011	IHR4	I	1	General	Lab-based	Pathogen	Animal	Indian Immunologicals Limited	Hyderabad	Biotechnol Res Int. 2011;2011:652147. Epub 2011 Oct 5.	40835	No
15603890	An immunogenicity study of a newly introduced purified Vero cell rabies vaccine (Abhayrab) manufactured in India.	Sampath G, Reddy SV, Rao ML, Rao YU, Palaniappan C.	Vaccine	Sampath G	2005	IHR1	C	1	General	Clinical/Facility-based	Human	Human	Institute of Preventive Medicine	Hyderabad	Vaccine. 2005 Jan 4;23(7):897-900.	38339	No
15629352	Rabies post-exposure prophylaxis in malnourished children exposed to suspect rabid animals.	Sampath G, Parikh S, Sangram P, Briggs DJ.	Vaccine	Sampath G	2005	IHR1	C	1	General	Clinical/Facility-based	Human	Human	Institute of Preventive Medicine	Hyderabad	Vaccine. 2005 Jan 19;23(9):1102-5.	38357	No
20403351	Immunogenicity and safety study of Indirab: a Vero cell based chromatographically purified human rabies vaccine.	Sampath G, Madhusudana SN, Sudarshan MK, Ashwathnarayana DH, Mahendra BJ, Ullas TP, Mohan K, Madhusudhan SK, Ravish HS.	Vaccine	Sampath G	2010	IHR4	J	1	General	Clinical/Facility-based	Human	Human	Institute of Preventive Medicine	Hyderabad	Vaccine. 2010 May 28;28(24):4086-90. Epub 2010 Apr 18.	40289	No
15916870	Immunogenic and antigenic properties of recombinant soluble glycoprotein of rabies virus.	Gupta PK, Sharma S, Walunj SS, Chaturvedi VK, Raut AA, Patial S, Rai A, Pandey KD, Saini M.	Vet Microbiol	Gupta PK	2005	IHR4	I	1	Animal	Lab-based	Pathogen	Animal	IVRI	Bareilley	Vet Microbiol. 2005 Jul 1;108(3-4):207-14.	38499	No
16178518	Development of rabies DNA vaccine using a recombinant plasmid.	Rai N, Kaushik P, Rai A.	Acta Virol	Rai N	2005	IHR4	I	1	General	Lab-based	Pathogen	Animal	IVRI	Izatnagar	Acta Virol. 2005;49(3):207-10.	38619	No
16808325	A DNA vaccine that encodes rabies virus glycoprotein lacking transmembrane domain enhances antibody response but not protection.	Gupta PK, Sharma S, Walunj SS, Patil AA, Rai A, Saini M.	Acta Virol	Gupta PK	2006	IHR4	I	1	General	Lab-based	Pathogen	Animal	IVRI	Izatnagar	Acta Virol. 2006;50(2):87-92.	38899	No
17391817	Virus neutralizing antibody response in mice and dogs with a bicistronic DNA vaccine encoding rabies virus glycoprotein and canine parvovirus VP2.	Patial S, Chaturvedi VK, Rai A, Saini M, Chandra R, Saini Y, Gupta PK.	Vaccine	Patial S	2007	IHR4	I	1	General	Lab-based	Dog	Animal	IVRI	Izatnagar	Vaccine. 2007 May 16;25(20):4020-8. Epub 2007 Mar 15.	39171	No
18848857	A sindbis virus replicon-based DNA vaccine encoding the rabies virus glycoprotein elicits immune responses and complete protection in mice from lethal challenge.	Saxena S, Dahiya SS, Sonwane AA, Patel CL, Saini M, Rai A, Gupta PK.	Vaccine	Saxena S	2008	IHR4	I	1	General	Lab-based	Pathogen	Animal	IVRI	Izatnagar	Vaccine. 2008 Dec 2;26(51):6592-601.	39735	No
19081687	Induction of immune responses and protection in mice against rabies using a self-replicating RNA vaccine encoding rabies virus glycoprotein.	Saxena S, Sonwane AA, Dahiya SS, Patel CL, Saini M, Rai A, Gupta PK.	Vet Microbiol	Saxena S	2009	IHR4	I	1	Animal	Lab-based	Pathogen	Animal	IVRI	Izatnagar	Vet Microbiol. 2009 Apr 14;136(1-2):36-44. Epub 2008 Nov 5.	39799	No
19356617	Poly(lactide-co-glycolide) microspheres: a potent oral delivery system to elicit systemic immune response against inactivated rabies virus.	Ramya R, Verma PC, Chaturvedi VK, Gupta PK, Pandey KD, Madhanmohan M, Kannaki TR, Sridevi R, Anukumar B.	Vaccine	Ramya R	2009	IHR4	I	1	General	Lab-based	Pathogen	Animal	IVRI	Izatnagar	Vaccine. 2009 Mar 26;27(15):2138-43. Epub 2009 Feb 6.	39913	No
19537908	Sindbis virus replicon-based DNA vaccine encoding Rabies virus glycoprotein elicits specific humoral and cellular immune response in dogs.	Gupta PK, Dahiya SS, Kumar P, Rai A, Patel CL, Sonwane AA, Saini M.	Acta Virol	Gupta PK	2009	IHR4	I	1	General	Lab-based	Dog	Animal	IVRI	Izatnagar	Acta Virol. 2009;53(2):83-8.	39987	No
21767857	Inhibition of rabies virus multiplication by siRNA delivered through adenoviral vector in vitro in BHK-21 cells and in vivo in mice.	Sonwane AA, Dahiya SS, Saini M, Chaturvedi VK, Singh RP, Gupta PK.	Res Vet Sci	Sonwane AA	2011	IHR4	I	1	Animal	Lab-based	Pathogen	Animal	IVRI	Izatnagar	Res Vet Sci. 2011 Jul 16. [Epub ahead of print]	40744	No
21864591	Intracerebral delivery of small interfering RNAs (siRNAs) using adenoviral vector protects mice against lethal peripheral rabies challenge.	Gupta PK, Sonwane AA, Singh NK, Meshram CD, Dahiya SS, Pawar SS, Gupta SP, Chaturvedi VK, Saini M.	Virus Res	Gupta PK	2011	IHR4	I	1	General	Lab-based	Pathogen	Animal	IVRI	Izatnagar	Virus Res. 2011 Aug 16. [Epub ahead of print]	40781	No
11334152	Preliminary report on a single-tube, non-interrupted reverse transcription-polymerase chain reaction for the detection of rabies virus in brain tissue.	Gupta PK, Singh RK, Sharma RN, Rao YU, Butchaiah G.	Vet Res Commun	Gupta PK	2001	IHR4	I	1	Animal	Lab-based	Pathogen	Animal	IVRI	Izatnagar	Vet Res Commun. 2001 Apr;25(3):239-47.	37015	No
19356616	Rabies DNA vaccine: no impact of MHC class I and class II targeting sequences on immune response and protection against lethal challenge.	Kaur M, Rai A, Bhatnagar R.	Vaccine	Kaur M	2009	IHR4	I	1	General	Lab-based	Pathogen	General	JNU	Delhi	Vaccine. 2009 Mar 26;27(15):2128-37. Epub 2009 Feb 6.	39913	No
19741168	Rabies DNA vaccine encoding lysosome-targeted glycoprotein supplemented with Emulsigen-D confers complete protection in preexposure and postexposure studies in BALB/c mice.	Kaur M, Saxena A, Rai A, Bhatnagar R.	FASEB J	Kaur M	2010	IHR4	I	1	General	Lab-based	Pathogen	General	JNU	Delhi	FASEB J. 2010 Jan;24(1):173-83. Epub 2009 Sep 9.	40067	No
12561501	A community survey of dog bites, anti-rabies treatment, rabies and dog population management in Bangalore city.	Sudarshan MK, Mahendra BJ, Narayan DH.	J Commun Dis	Sudarshan MK	2001	IHR1	A	4	Human	Urban community-based	Human	Human	KIMS	Bangalore	J Commun Dis. 2001 Dec;33(4):245-51.	37656	No
16678463	Assessing the burden of human rabies in India: results of a national multi-center epidemiological survey.	Sudarshan MK, Madhusudana SN, Mahendra BJ, Rao NS, Ashwath Narayana DH, Abdul Rahman S, Meslin FX, Lobo D, Ravikumar K, Gangaboraiah.	Int J Infect Dis	Sudarshan MK	2007	IHR1	A	4	Human	Urban-Rural (mixed) community-based	Human	Human	KIMS	Bangalore	Int J Infect Dis. 2007 Jan;11(1):29-35. Epub 2006 May 4.	38846	No
17033270	Assessing the relationship between antigenicity and immunogenicity of human rabies vaccines. Results of a meta-analysis.	Sudarshan MK, Mahendra BJ, Madhusudana SN, Narayana DH, Sanjay TV, Gangaboraiah, Anandagiri MS.	Hum Vaccin	Sudarshan MK	2005	IHR1	C	1	Human	Clinical/Facility-based	Human	Human	KIMS	Bangalore	Hum Vaccin. 2005 Sep-Oct;1(5):187-90. Epub 2005 Sep 18.	39003	No
17100105	Boosting effect of purified chick embryo cell rabies vaccine using the intradermal route in persons previously immunized by the intramuscular route or vice versa.	Sudarshan MK, Madhusudana SN, Mahendra BJ, Narayana DH, Giri MS, Muhamuda K, Ravish HS, Venkatesh GM.	Natl Med J India	Sudarshan MK	2006	IHR4	J	1	Human	Clinical/Facility-based	Human	Human	KIMS	Bangalore	Natl Med J India. 2006 Jul-Aug;19(4):192-4.	39036	No
17370688	An epidemiological study of animal bites in India: results of a WHO sponsored national multi-centric rabies survey.	Sudarshan MK, Mahendra BJ, Madhusudana SN, Ashwoath Narayana DH, Rahman A, Rao NS, X-Meslin F, Lobo D, Ravikumar K, Gangaboraiah.	J Commun Dis	Sudarshan MK	2006	IHR1	B	4	Human	Urban-Rural (mixed) community-based	Human	Human	KIMS	Bangalore	J Commun Dis. 2006 Mar;38(1):32-9.	39162	No
17375003	Assessing the safety of post-exposure rabies immunization in pregnancy.	Sudarshan MK, Giri MS, Mahendra BJ, Venkatesh GM, Sanjay TV, Narayana DH, Ravish HS.	Hum Vaccin	Sudarshan MK	2007	IHR4	J	1	Human	Clinical/Facility-based	Human	Human	KIMS	Bangalore	Hum Vaccin. 2007 May-Jun;3(3):87-9. Epub 2007 May 6.	39163	No
17981377	A comparative study on the immunogenicity, safety and tolerance of purified duck embryo vaccine (PDEV) manufactured in India (Vaxirab) and Switzerland (Lyssavac-N): a randomized simulated post-exposure study in healthy volunteers.	Mahendra BJ, Madhusudana SN, Ashwathnarayana DH, Sampath G, datta SS, Sudarshan MK, Venkatesh GM, Muhamuda K, Bilagumba G, Shamanna M.	Vaccine	Mahendra BJ	2007	IHR4	J	1	General	Clinical/Facility-based	Human	Human	KIMS	Bangalore	Vaccine. 2007 Dec 5;25(50):8405-9. Epub 2007 Oct 22.	39392	No
18682695	An immunogenicity, safety and post-marketing surveillance of a novel adsorbed human diploid cell rabies vaccine (Rabivax) in Indian subjects.	Sudarshan MK, Bhardwaj S, Mahendra BJ, Sharma H, Sanjay TV, Ashwathnarayana DH, Bilagumba G.	Hum Vaccin	Sudarshan MK	2008	IHR4	J	1	Human	Clinical/Facility-based	Human	Human	KIMS	Bangalore	Hum Vaccin. 2008 Jul-Aug;4(4):275-9.	39667	No
19818720	A comparative study on the safety and immunogenicity of Purified duck embryo vaccine [corrected] (PDEV, Vaxirab) with purified chick embryo cell vaccine (PCEC, Rabipur) and purifed vero cell rabies vaccine (PVRV, Verorab).	Ashwathnarayana DH, Madhusudana SN, Sampath G, Sathpathy DM, Mankeshwar R, Ravish HH, Ullas PT, Behra TR, Sudarshan MK, Gangaboraiah, Shamanna M.	Vaccine	Ashwathnarayana DH	2009	IHR4	J	1	General	Clinical/Facility-based	Human	Human	KIMS	Bangalore	Vaccine. 2009 Dec 10;28(1):148-51. Epub 2009 Oct 8. Erratum in: Vaccine. 2010 Mar 16;28(13):2575.	40099	No
20523131	Assessing the relationship between antigenicity and immunogenicity of human rabies vaccines when administered by intradermal route: results of a metaanalysis.	Sudarshan MK, Gangaboraiah B, Ravish HS, Narayana DH.	Hum Vaccin	Sudarshan MK	2010	IHR4	J	1	Human	Clinical/Facility-based	Pathogen	Human	KIMS	Bangalore	Hum Vaccin. 2010 Jul;6(7):562-5. Epub 2010 Jul 1.	40334	No
20859051	A survey of hospitals managing human rabies cases in India.	Sudarshan MK, Ashwath Narayana DH.	Indian J Public Health	Sudarshan MK	2010	IHR2	E	4	Human	Clinical/Facility-based	Human	Human	KIMS	Bangalore	Indian J Public Health. 2010 Jan-Mar;54(1):40-1.	40444	No
21668049	Is the skin sensitivity test required for administering equine rabies immunoglobulin?	Sudarshan MK, Ashwath Narayana DH, Ravish HS.	Natl Med J India	Sudarshan MK	2011	IHR3	F	1	Human	Clinical/Facility-based	Human	Human	KIMS	Bangalore	Natl Med J India. 2011 Mar-Apr;24(2):80-2.	40709	No
18398307	Protecting Indian schoolchildren against rabies: pre-exposure vaccination with purified chick embryo cell vaccine (PCECV) or purified verocell rabies vaccine (PVRV).	Shanbag P, Shah N, Kulkarni M, Juvekar M, Madhusudana SN, Vakil HB, Malerczyk C.	Hum Vaccin	Shanbag P	2008	IHR4	J	1	Human	Clinical/Facility-based	Human	Human	Lokmanya Tilak Municipal College and General Hospital	Mumbai	Hum Vaccin. 2008 Sep-Oct;4(5):365-9. Epub 2008 Oct 1.	39548	No
16739219	Detection of rabies virus antigen or antibody using flow cytometry.	Vengatesan D, Raj GD, Raja A, Ramadass P, Gunaseelan L.	Cytometry B Clin Cytom	Vengatesan D	2006	IHR4	I	1	General	Lab-based	Pathogen	Animal	Madras Veterinary College	Chennai	Cytometry B Clin Cytom. 2006 Sep 15;70(5):335-43.	38870	No
20861692	Immunogenicity, safety and tolerance of a purified duck embryo vaccine (PDEV, VAXIRAB) for rabies post-exposure prophylaxis: Results of a multicentric study in India.	Mahendra BJ, Madhusudana SN, Sampath G, Datta SS, Ashwathnarayana DH, Venkatesh GM, Sudarshan MK, Bilugumba G, Shamanna M.	Hum Vaccin	Mahendra BJ	2010	IHR4	J	1	Human	Clinical/Facility-based	Human	Human	MIMS	Mandya	Hum Vaccin. 2010 Sep 30;6(9). [Epub ahead of print]	40445	No
16038998	High level expression of surface glycoprotein of rabies virus in tobacco leaves and its immunoprotective activity in mice.	Ashraf S, Singh PK, Yadav DK, Shahnawaz M, Mishra S, Sawant SV, Tuli R.	J Biotechnol	Ashraf S	2005	IHR4	I	1	General	Lab-based	Pathogen	General	National Botanical Research Institute	Lucknow	J Biotechnol. 2005 Sep 22;119(1):1-14.	38559	No
19818857	Rabies glycoprotein fused with B subunit of cholera toxin expressed in tobacco plants folds into biologically active pentameric protein.	Roy S, Tyagi A, Tiwari S, Singh A, Sawant SV, Singh PK, Tuli R.	Protein Expr Purif	Roy S	2010	IHR4	I	1	General	Lab-based	Pathogen	General	National Botanical Research Institute	Lucknow	Protein Expr Purif. 2010 Apr;70(2):184-90. Epub 2009 Oct 8.	40099	No
19820945	High level expression of a functionally active cholera toxin B: rabies glycoprotein fusion protein in tobacco seeds.	Tiwari S, Mishra DK, Roy S, Singh A, Singh PK, Tuli R.	Plant Cell Rep	Tiwari S	2009	IHR4	I	1	Plants	Lab-based	Pathogen	General	National Botanical Research Institute	Lucknow	Plant Cell Rep. 2009 Dec;28(12):1827-36. Epub 2009 Oct 10.	40099	No
16448727	Nonclinical toxicology study of recombinant-plasmid DNA anti-rabies vaccines.	Kumar PU, Kumar BD, Annapurna VV, Krishna TP, Kalyanasundaram S, Suresh P, Harishankar N, Jagadeesan V, Hariharan S, Naidu AN, Krishnaswamy K, Rangarajan PN, Srinivasan VA, Reddy GS, Sesikeran B.	Vaccine	Kumar PU	2006	IHR3	H	1	General	Lab-based	Pathogen	Human	National Institute of Nutrition	Hyderabad	Vaccine. 2006 Apr 5;24(15):2790-8. Epub 2006 Jan 13.	38750	No
11752732	Epidemiological characteristics of rabies in Delhi and surrounding areas, 1998.	Singh J, Jain DC, Bhatia R, Ichhpujani RL, Harit AK, Panda RC, Tewari KN, Sokhey J.	Indian Pediatr	Singh J	2001	IHR1	A	4	Human	Urban community-based	Human	Human	NCDC	Delhi	Indian Pediatr. 2001 Dec;38(12):1354-60.	37251	No
15080408	Human rabies in Delhi.	Chhabra M, Ichhpujani RL, Tewari KN, Lal S.	Indian J Pediatr	Chhabra M	2004	IHR1	A	4	Human	Clinical/Facility-based	Human	Human	NCDC	Delhi	Indian J Pediatr. 2004 Mar;71(3):217-20.	38092	No
15928417	Safety and immunogenicity of the intradermal Thai red cross (2-2-2-0-1-1) post exposure vaccination regimen in the Indian population using purified chick embryo cell rabies vaccine.	Chhabra M, Ichhpujani RL, Bhardwaj M, Tiwari KN, Panda RC, Lal S.	Indian J Med Microbiol	Chhabra M	2005	IHR3	F	1	Human	Clinical/Facility-based	Human	Human	NCDC	New Delhi	Indian J Med Microbiol. 2005 Jan;23(1):24-8.	38505	No
17901648	Development and evaluation of an in vitro isolation of street rabies virus in mouse neuroblastoma cells as compared to conventional tests used for diagnosis of rabies.	Chhabra M, Mittal V, Jaiswal R, Malik S, Gupta M, Lal S.	Indian J Med Microbiol	Chhabra M	2007	IHR4	I	1	Human	Lab-based	Pathogen	Human	NCDC	Delhi	Indian J Med Microbiol. 2007 Jul;25(3):263-6.	39354	No
15978691	DNA vaccine for rabies: relevance of the trans-membrane domain of the glycoprotein in generating an antibody response.	Rath A, Choudhury S, Batra D, Kapre SV, Rupprecht CE, Gupta SK.	Virus Res	Rath A	2005	IHR4	I	1	General	Lab-based	Pathogen	General	NII	New Delhi	Virus Res. 2005 Nov;113(2):143-52.	38531	No
12718837	Economical multi-site intradermal regimen with purified chick embryo cell vaccine (Rabipur) prevents rabies in people bitten by confirmed rabid animals.	Madhusudana SN, Anand NP, Shamsundar R.	Int J Infect Dis	Madhusudana SN	2002	IHR1	C	1	Human	Clinical/Facility-based	Human	Human	NIMHANS	Bangalore	Int J Infect Dis. 2002 Sep;6(3):210-4.	37741	No
12829034	Development and evaluation of a latex agglutination test for rabies antibodies.	Madhusudana SN, Saraswati S.	J Clin Virol	Madhusudana SN	2003	IHR4	I	1	General	Lab-based	Pathogen	Human	NIMHANS	Bangalore	J Clin Virol. 2003 Jul;27(2):129-35.	37800	No
14690777	In vitro inactivation of the rabies virus by ascorbic acid.	Madhusudana SN, Shamsundar R, Seetharaman S.	Int J Infect Dis	Madhusudana SN	2004	IHR4	I	1	Human	Lab-based	Pathogen	Human	NIMHANS	Bangalore	Int J Infect Dis. 2004 Jan;8(1):21-5.	37979	No
15109593	Simulated post-exposure rabies vaccination with purified chick embryo cell vaccine using a modified Thai Red Cross regimen.	Madhusudana SN, Sanjay TV, Mahendra BJ, Suja MS.	Int J Infect Dis	Madhusudana SN	2004	IHR1	C	1	Human	Clinical/Facility-based	Human	Human	NIMHANS	Bangalore	Int J Infect Dis. 2004 May;8(3):175-9.	38105	No
15494255	Rapid diagnosis of rabies in humans and animals by a dot blot enzyme immunoassay.	Madhusudana SN, Paul JP, Abhilash VK, Suja MS.	Int J Infect Dis	Madhusudana SN	2004	IHR4	I	1	Human	Lab-based	Pathogen	Human	NIMHANS	Bangalore	Int J Infect Dis. 2004 Nov;8(6):339-45.	38281	No
16295401	Development and evaluation of an enzyme immunoassay for rapid diagnosis of rabies in humans and animals.	Vasanth JP, Madhusudana SN, Abhilash KV, Suja MS, Muhamuda K.	Indian J Pathol Microbiol	Vasanth JP	2004	IHR4	I	1	Human	Lab-based	Pathogen	Human	NIMHANS	Bangalore	Indian J Pathol Microbiol. 2004 Oct;47(4):574-8.	38678	No
16504574	Ante mortem diagnosis of human rabies using saliva samples: comparison of real time and conventional RT-PCR techniques.	Nagaraj T, Vasanth JP, Desai A, Kamat A, Madhusudana SN, Ravi V.	J Clin Virol	Nagaraj T	2006	IHR3	F	1	General	Lab-based	Pathogen	Human	NIMHANS	Bangalore	J Clin Virol. 2006 May;36(1):17-23. Epub 2006 Feb 28.	38777	No
17035734	Comparison of saftey and immunogenicity of purified chick embryo cell rabies vaccine (PCECV) and purified vero cell rabies vaccine (PVRV) using the Thai Red Cross intradermal regimen at a dose of 0.1 ML.	Madhusudana SN, Sanjay TV, Mahendra BJ, Sudarshan MK, Narayana DH, Giri A, Muhamuda K, Ravi V, Vakil HB, Malerczyk C.	Hum Vaccin	Madhusudana SN	2006	IHR4	J	1	Human	Clinical/Facility-based	Human	Human	NIMHANS	Bangalore	Hum Vaccin. 2006 Sep-Oct;2(5):200-4.	39003	No
17321182	Development and evaluation of a competitive ELISA for estimation of rabies neutralizing antibodies after post-exposure rabies vaccination in humans.	Muhamuda K, Madhusudana SN, Ravi V.	Int J Infect Dis	Muhamuda K	2007	IHR4	I	1	Human	Lab-based	Human	Human	NIMHANS	Bangalore	Int J Infect Dis. 2007 Sep;11(5):441-5. Epub 2007 Feb 23.	39140	No
17637573	Use of neutralizing murine monoclonal antibodies to rabies glycoprotein in passive immunotherapy against rabies.	Muhamuda K, Madhusudana SN, Ravi V.	Hum Vaccin	Muhamuda K	2007	IHR4	I	1	Human	Lab-based	Pathogen	Human	NIMHANS	Bangalore	Hum Vaccin. 2007 Sep-Oct;3(5):192-5. Epub 2007 May 3.	39283	No
18363090	Molecular characterization of the full-length genome of a rabies virus isolate from India.	Nagaraja T, Madhusudana S, Desai A.	Virus Genes	Nagaraja T	2008	IHR1	B	1	General	Lab-based	Pathogen	Human	NIMHANS	Bangalore	Virus Genes. 2008 Jun;36(3):449-59. Epub 2008 Mar 25.	39533	No
19353843	Neuroanatomical mapping of rabies nucleocapsid viral antigen distribution and apoptosis in pathogenesis in street dog rabies--an immunohistochemical study.	Suja MS, Mahadevan A, Madhusudhana SN, Vijayasarathi SK, Shankar SK.	Clin Neuropathol	Suja MS	2009	IHR1	B	1	Human	Lab-based	Pathogen	Human	NIMHANS	Bangalore	Clin Neuropathol. 2009 Mar-Apr;28(2):113-24.	39913	No
19965838	Rabies viral encephalitis: clinical determinants in diagnosis with special reference to paralytic form.	Gadre G, Satishchandra P, Mahadevan A, Suja MS, Madhusudana SN, Sundaram C, Shankar SK.	J Neurol Neurosurg Psychiatry	Gadre G	2010	IHR1	A	1	Human	Clinical/Facility-based	Human	Human	NIMHANS	Bangalore	J Neurol Neurosurg Psychiatry. 2010 Jul;81(7):812-20. Epub 2009 Dec 3.	40155	No
20947403	Utility of human embryonic kidney cell line HEK-293 for rapid isolation of fixed and street rabies viruses: comparison with Neuro-2a and BHK-21 cell lines.	Madhusudana SN, Sundaramoorthy S, Ullas PT.	Int J Infect Dis	Madhusudana SN	2010	IHR4	I	1	Human	Lab-based	Pathogen	Human	NIMHANS	Bangalore	Int J Infect Dis. 2010 Dec;14(12):e1067-71. Epub 2010 Oct 13.	40467	No
21876844	Role of apoptosis in rabies viral encephalitis: a comparative study in mice, canine, and human brain with a review of literature.	Suja MS, Mahadevan A, Madhusudana SN, Shankar SK.	Patholog Res Int	Suja MS	2011	IHR4	I	1	Human	Lab-based	Pathogen	Human	NIMHANS	Bangalore	Patholog Res Int. 2011;2011:374286. Epub 2011 Aug 25.	40786	No
11467142	Evaluation of two intradermal vaccination regimens using purified chick embryo cell vaccine for post-exposure prophylaxis of rabies.	Madhusudana SN, Anand NP, Shamsundar R.	Natl Med J India	Madhusudana SN	2001	IHR1	C	1	Human	Clinical/Facility-based	Human	Human	NIMHANS	Bangalore	Natl Med J India. 2001 May-Jun;14(3):145-7.	37099	No
15811642	The real cost of rabies post-exposure treatments.	Goswami A, Plun-Favreau J, Nicoloyannis N, Sampath G, Siddiqui MN, Zinsou JA.	Vaccine	Goswami A	2005	IHR2	E	4	General	Clinical/Facility-based	Human	Human	Pasteur Institute of India	Kolkata	Vaccine. 2005 Apr 27;23(23):2970-6.	38449	No
16046167	Purification, potency and immunogenicity analysis of Vero cell culture-derived rabies vaccine: a comparative study of single-step column chromatography and zonal centrifuge purification.	Prem Kumar AA, Mani KR, Palaniappan C, Bhau LN, Swaminathan K.	Microbes Infect	Prem Kumar AA	2005	IHR4	I	1	General	Lab-based	Pathogen	Human	Pasteur Institute of India	Coonnoor	Microbes Infect. 2005 Jul;7(9-10):1110-6.	38561	No
16233321	Process standardization for optimal virus recovery and removal of substrate DNA and bovine serum proteins in Vero cell-derived rabies vaccine.	Kumar AA, Rao YU, Joseph AL, Mani KR, Swaminathan K.	J Biosci Bioeng	Kumar AA	2002	IHR4	I	1	General	Lab-based	Pathogen	Human	Pasteur Institute of India	Coonnoor	J Biosci Bioeng. 2002;94(5):375-83.	38645	No
20384277	Standardization and assessment of cell culture media quantities in roller poly ethylene terephthalate bottles employed in the industrial rabies viral vaccine production.	Jagannathan S, Chaansha S, Rajesh K, Santhiya T, Charles C, Venkataramana KN.	Pak J Biol Sci	Jagannathan S	2009	IHR3	F	1	General	Lab-based	Pathogen	Human	Pasteur Institute of India	Coonnoor	Pak J Biol Sci. 2009 Sep 15;12(18):1246-52.	40282	No
12175346	Rabies viral antigen in extracranial organs: a post-mortem study.	Jogai S, Radotra BD, Banerjee AK.	Neuropathol Appl Neurobiol	Jogai S	2002	IHR1	B	1	Human	Lab-based	Human	Human	PGI	Chandigarh	Neuropathol Appl Neurobiol. 2002 Aug;28(4):334-8.	37483	No
17881871	Usefulness of reverse transcriptase-polymerase chain reaction for detection of rabies RNA in archival samples.	Biswal M, Ratho R, Mishra B.	Jpn J Infect Dis	Biswal M	2007	IHR4	I	1	Human	Lab-based	Pathogen	Human	PGI	Chandigarh	Jpn J Infect Dis. 2007 Sep;60(5):298-9.	39346	No
19857907	Correlation of cytokine expression with rabies virus distribution in rabies encephalitis.	Solanki A, Radotra BD, Vasishta RK.	J Neuroimmunol	Solanki A	2009	IHR4	I	1	Human	Lab-based	Pathogen	Human	PGI	Chandigarh	J Neuroimmunol. 2009 Dec 10;217(1-2):85-9. Epub 2009 Oct 25.	40114	No
20676764	Prevalence of rabies antibodies in street and household dogs in Chandigarh, India.	Singh MP, Goyal K, Majumdar M, Ratho RK.	Trop Anim Health Prod	Singh MP	2011	IHR1	B	1	Animal	Urban community-based	Dog	Human	PGI	Chandigarh	Trop Anim Health Prod. 2011 Jan;43(1):111-4. Epub 2010 Jul 31.	40393	No
21377707	'Zoonoses? Not sure what that is...' An assessment of knowledge of zoonoses among medical students in India.	Kakkar M, Ramani S, Menon G, Sankhe L, Gaidhane A, Krishnan S.	Trans R Soc Trop Med Hyg	Kakkar M	2011	IHR2	D	4	Human	Occupational	Human	Human	PHFI	Delhi	Trans R Soc Trop Med Hyg. 2011 May;105(5):254-61. Epub 2011 Mar 5.	40610	No
17637572	Immunogenicity of two modern tissue culture rabies vaccines in pre-exposure prophylaxis.	Kulkarni PS, Raut SK, Jadhav SS, Kapre SV, Deuskar N.	Hum Vaccin	Kulkarni PS	2007	IHR4	K	1	Human	Occupational	Human	General	Serum Institute of India	Pune	Hum Vaccin. 2007 Sep-Oct;3(5):183-6. Epub 2007 Apr 30.	39283	No
15230475	Characterization of nucleoprotein gene sequence of an Indian isolate of rabies virus.	Jayakumar R, Tirumurugaan KG, Ganga G, Kumanan K, Mahalinga Nainar A.	Acta Virol	Jayakumar R	2004	IHR1	B	1	General	Lab-based	Pathogen	Animal	TNVASU	Chennai	Acta Virol. 2004;48(1):47-50.	38171	No
11950657	Radiculomyelitic rabies: can MR imaging help?	Desai RV, Jain V, Singh P, Singhi S, Radotra BD.	AJNR Am J Neuroradiol	Desai RV	2002	0	0	0	0	0	0	0	0	0	AJNR Am J Neuroradiol. 2002 Apr;23(4):632-4.	37362	Yes
12626831	Neurological complications of rabies vaccines.	Tullu MS, Rodrigues S, Muranjan MN, Bavdekar SB, Kamat JR, Hira PR.	Indian Pediatr	Tullu MS	2003	0	0	0	0	0	0	0	0	0	Indian Pediatr. 2003 Feb;40(2):150-4.	37691	Yes
12840128	Magnetic resonance imaging in rabies.	Mani J, Reddy BC, Borgohain R, Sitajayalakshmi S, Sundaram C, Mohandas S.	Postgrad Med J	Mani J	2003	0	0	0	0	0	0	0	0	0	Postgrad Med J. 2003 Jun;79(932):352-4.	37806	Yes
12921319	Controversies in rabies vaccination.	Ghosh TK.	Indian J Pediatr	Ghosh TK	2003	0	0	0	0	0	0	0	0	0	Indian J Pediatr. 2003 Jun;70(6):495-8.	37852	Yes
12930096	Status of immunodiagnosis and immunocontraceptive vaccines in India.	Gupta SK.	Adv Biochem Eng Biotechnol	Gupta SK	2003	0	0	0	0	0	0	0	0	0	Adv Biochem Eng Biotechnol. 2003;85:181-214. Review.	37855	Yes
14509578	Cerebral cysticercosis mimicking rabies in a dog.	Suja MS, Mahadevan A, Madhusudana SN, Vijayasarathy SK, Shankar SK.	Vet Rec	Suja MS	2003	0	0	0	0	0	0	0	0	0	Vet Rec. 2003 Sep 6;153(10):304-5. No abstract available.	37890	Yes
14660844	Subcutaneous emphysema.	Vijayalakshmi AM, Vel MT.	Indian Pediatr	Vijayalakshmi AM	2003	0	0	0	0	0	0	0	0	0	Indian Pediatr. 2003 Nov;40(11):1092-3. No abstract available.	37964	Yes
15069254	Biphasic demyelination of the nervous system following anti-rabies vaccination.	Kulkarni V, Nadgir D, Tapiawala S, Malabari A, Kalgikar A, Kela R, Nadkar M, Kamath S, Shah A.	Neurol India	Kulkarni V	2004	0	0	0	0	0	0	0	0	0	Neurol India. 2004 Mar;52(1):106-8.	38085	Yes
15076969	Bilateral optic neuritis complicating rabies vaccination.	Gupta V, Bandyopadhyay S, Bapuraj JR, Gupta A.	Retina	Gupta V	2004	0	0	0	0	0	0	0	0	0	Retina. 2004 Feb;24(1):179-81. No abstract available.	38090	Yes
15267054	Retrobulbar neuritis following rabies vaccination.	Dadeya S, Guliani BP, Gupta VS, Malik KP, Jain DC.	Trop Doct	Dadeya S	2004	0	0	0	0	0	0	0	0	0	Trop Doct. 2004 Jul;34(3):174-5. No abstract available.	38191	Yes
15584211	Rabies encephalitis following fox bite--histological and immunohistochemical evaluation of lesions caused by virus.	Suja MS, Mahadevan A, Sundaram C, Mani J, Sagar BC, Hemachudha T, Wacharapluesadee S, Madhusudana SN, Shankar SK.	Clin Neuropathol	Suja MS	2004	0	0	0	0	0	0	0	0	0	Clin Neuropathol. 2004 Nov-Dec;23(6):271-6.	38330	Yes
16105182	Bilateral neuro-retinitis following chick embryo cell anti-rabies vaccination--a case report.	Saxena R, Sethi HS, Rai HK, Menon V.	BMC Ophthalmol	Saxena R	2005	0	0	0	0	0	0	0	0	0	BMC Ophthalmol. 2005 Aug 17;5:20.	38582	Yes
16106083	Rabies: an ancient disease that still prevails.	Madhusudana SN.	Indian J Med Res	Madhusudana SN	2005	0	0	0	0	0	0	0	0	0	Indian J Med Res. 2005 Jul;122(1):4-6. No abstract available.	38582	Yes
16931137	Presence of rabies specific immune complexes in cerebro-spinal fluid can help in ante-mortem diagnosis of human paralytic rabies.	Muhamuda K, Madhusudana SN, Ravi V, Desai A.	J Clin Virol	Muhamuda K	2006	0	0	0	0	0	0	0	0	0	J Clin Virol. 2006 Nov;37(3):162-7. Epub 2006 Aug 23.	38955	Yes
17010311	Regulation of Ca2+/calmodulin kinase II inhibitor alpha (CaMKIINalpha) in virus-infected mouse brain.	Saha S, Ramanathan A, Rangarajan PN.	Biochem Biophys Res Commun	Saha S	2006	0	0	0	0	0	0	0	0	0	Biochem Biophys Res Commun. 2006 Nov 17;350(2):444-9. Epub 2006 Sep 22.	38993	Yes
17131907	Is the anti-sarcoma and anti-viral cytokine plasma factor" a novel chicken Y-box protein?"	Shirodkar MV, Sehgal PB.	Indian J Exp Biol	Shirodkar MV	2006	0	0	0	0	0	0	0	0	0	Indian J Exp Biol. 2006 Oct;44(10):777-82. Review.	39051	Yes
17444048	Introducing intradermal rabies vaccination in India: paradigm shift for the better.	Sudarshan MK.	Indian J Public Health	Sudarshan MK	2006	0	0	0	0	0	0	0	0	0	Indian J Public Health. 2006 Oct-Dec;50(4):209-12. No abstract available.	39193	Yes
17566293	Feasibility and challenges in the development of immunocontraceptive vaccine based on zona pellucida glycoproteins.	Choudhury S, Srivastava N, Narwal PS, Rath A, Jaiswal S, Gupta SK.	Soc Reprod Fertil Suppl	Choudhury S	2007	0	0	0	0	0	0	0	0	0	Soc Reprod Fertil Suppl. 2007;63:479-93. Review.	39248	Yes
17766805	Rabies in India: an ABC approach to combating the disease in street dogs.	Reece JF.	Vet Rec	Reece JF	2007	0	0	0	0	0	0	0	0	0	Vet Rec. 2007 Sep 1;161(9):292-3. Review. No abstract available.	39329	Yes
17921563	Rabies encephalitis.	Mohite A, Prasad V, Rajam L, Madhusudana SN.	Indian Pediatr	Mohite A	2007	0	0	0	0	0	0	0	0	0	Indian Pediatr. 2007 Sep;44(9):702-4.	39364	Yes
17990790	Human monoclonal antibody and vaccine approaches to prevent human rabies.	Nagarajan T, Rupprecht CE, Dessain SK, Rangarajan PN, Thiagarajan D, Srinivasan VA.	Curr Top Microbiol Immunol	Nagarajan T	2008	0	0	0	0	0	0	0	0	0	Curr Top Microbiol Immunol. 2008;317:67-101. Review.	39396	Yes
18217872	Acute demyelinating encephalomyelitis due to neural antirabies vaccine.	Shah I.	J Travel Med	Shah I	2008	0	0	0	0	0	0	0	0	0	J Travel Med. 2008 Jan-Feb;15(1):58-9.	39473	Yes
18299543	Rabies in India.	Menezes R.	CMAJ	Menezes R	2008	0	0	0	0	0	0	0	0	0	CMAJ. 2008 Feb 26;178(5):564-6. No abstract available.	39505	Yes
18417888	Morbidity pattern of hydatid disease (cystic echinococcosis) and lack of its knowledge in patients attending Mamata General Hospital, Khammam, Andhra Pradesh.	Hemachander SS, Prasad CR, Jessica M.	Indian J Pathol Microbiol	Hemachander SS	2008	0	0	0	0	0	0	0	0	0	Indian J Pathol Microbiol. 2008 Jan-Mar;51(1):143-5.	39556	Yes
18425596	DNA vaccines and their applications in veterinary practice: current perspectives.	Dhama K, Mahendran M, Gupta PK, Rai A.	Vet Res Commun	Dhama K	2008	0	0	0	0	0	0	0	0	0	Vet Res Commun. 2008 Jun;32(5):341-56. Epub 2008 Apr 19. Review.	39560	Yes
18634476	New steps in the control of canine rabies in India.	Pradhan HK, Gurbuxani JP, Cliquet F, Pattnaik B, Patil SS, Regnault A, Begouen H, Guiot AL, Sood R, Mahl P, Singh R, Picard E, Aubert MF, Barrat J, Meslin FX.	Dev Biol (Basel)	Pradhan HK	2008	0	0	0	0	0	0	0	0	0	Dev Biol (Basel). 2008;131:157-66.	39648	Yes
18955584	Retraction. Tracking the footprints of the rabies virus: are we any closer to decoding this elusive virus?	Mahadevan A, Ms S, Sk S.	J Clin Pathol	Mahadevan A	2008	0	0	0	0	0	0	0	0	0	J Clin Pathol. 2008 Nov;61(11):1232. No abstract available.	39750	Yes
19121828	Injuries from leopard attacks in Kashmir.	Nabi DG, Tak SR, Kangoo KA, Halwai MA.	Injury	Nabi DG	2009	0	0	0	0	0	0	0	0	0	Injury. 2009 Jan;40(1):90-2. Epub 2009 Jan 3.	39819	Yes
19245154	Rabies: control strategies for Himalayan states of the Indian subcontinent.	Panda AK, Thakur SD, Katoch RC.	J Commun Dis	Panda AK	2008	0	0	0	0	0	0	0	0	0	J Commun Dis. 2008 Sep;40(3):169-75.	39872	Yes
19881109	Case Report: Magnetic resonance imaging in rabies encephalitis.	Rao AS, Varma DR, Chalapathi Rao MV, Mohandas S.	Indian J Radiol Imaging	Rao AS	2009	0	0	0	0	0	0	0	0	0	Indian J Radiol Imaging. 2009 Oct-Dec;19(4):301-4.	40120	Yes
19966972	Antemortem diagnosis and prevention of human rabies.	Madhusudana SN, Sukumaran SM.	Ann Indian Acad Neurol	Madhusudana SN	2008	0	0	0	0	0	0	0	0	0	Ann Indian Acad Neurol. 2008 Jan;11(1):3-12.	39448	Yes
20075553	Recurrent opisthotonus in catatonia: An atypical presentation.	Manjunatha N, Mehta UM, John P.	Indian J Med Sci	Manjunatha N	2009	0	0	0	0	0	0	0	0	0	Indian J Med Sci. 2009 Nov;63(11):512-6.	40194	Yes
21227500	Continuing challenge of infectious diseases in India.	John TJ, Dandona L, Sharma VP, Kakkar M.	Lancet	John TJ	2011	0	0	0	0	0	0	0	0	0	Lancet. 2011 Jan 15;377(9761):252-69. Epub 2011 Jan 10.	40557	Yes
21373831	Update on Available Vaccines in India: Report of the APPA VU 2010: I.	Karande S.	Indian J Pediatr	Karande S	2011	0	0	0	0	0	0	0	0	0	Indian J Pediatr. 2011 Jul;78(7):845-53. Epub 2011 Mar 5.	40607	Yes
21552001	Application of PHEL (Public Health Epidemiological Logic) in devising a vaccination policy: A broad public health criteria-for routine Immunization.	Patil RR.	Hum Vaccin	Patil RR	2011	0	0	0	0	0	0	0	0	0	Hum Vaccin. 2011 May 1;7(5):576-8. Epub 2011 May 1.	40673	Yes
21654116	Fatal rabies despite post-exposure prophylaxis.	Deshmukh DG, Damle AS, Bajaj JK, Bhakre JB, Patil NS.	Indian J Med Microbiol	Deshmukh DG	2011	0	0	0	0	0	0	0	0	0	Indian J Med Microbiol. 2011 Apr-Jun;29(2):178-80.	40704	Yes
21656332	Hypersexuality in a 28-Year-Old Woman with Rabies.	Senthilkumaran S, Balamurgan N, Sweni S, Menezes RG, Thirumalaikolundusubramanian P.	Arch Sex Behav	Senthilkumaran S	2011	0	0	0	0	0	0	0	0	0	Arch Sex Behav. 2011 Jun 9. [Epub ahead of print]	40704	Yes
21734465	Intra-dermal administration of rabies vaccines in developing countries: At an affordable cost.	Verma R, Khanna P, Prinja S, Rajput M.	Hum Vaccin	Verma R	2011	0	0	0	0	0	0	0	0	0	Hum Vaccin. 2011 Jul 1;7(7). [Epub ahead of print]	40732	Yes
21976934	Dog bite injuries of genitalia in male infant and children.	Bothra R, Bhat A, Saxena G, Chaudhary G, Narang V.	Urol Ann	Bothra R	2011	0	0	0	0	0	0	0	0	0	Urol Ann. 2011 Sep;3(3):167-9.	40823	Yes
21922292	Erratum to: Molecular characterization of Indian rabies virus isolates by partial sequencing of nucleoprotein (N) and phosphoprotein (P) genes.	Reddy GB, Singh R, Singh RP, Singh KP, Gupta PK, Mahadevan A, Shankar SK, Ramakrishnan MA, Verma R.	Virus Genes	Reddy GB	2011	0	0	0	0	0	0	0	0	0	Virus Genes. 2011 Sep 16. [Epub ahead of print] No abstract available.	40803	Yes
21887173	Acute flaccid paralysis due to rabies.	Ghosh JB, Roy M, Lahiri K, Bala AK, Roy M.	J Pediatr Neurosci	Ghosh JB	2009	0	0	0	0	0	0	0	0	0	J Pediatr Neurosci. 2009 Jan;4(1):33-5.	39814	Yes
11290477	Imaging findings in rabies encephalitis.	Awasthi M, Parmar H, Patankar T, Castillo M.	AJNR Am J Neuroradiol	Awasthi M	2001	0	0	0	0	0	0	0	0	0	AJNR Am J Neuroradiol. 2001 Apr;22(4):677-80.	36987	Yes
21991437	Human Rabies in the WHO Southeast Asia Region: Forward Steps for Elimination.	Gongal G, Wright AE.	Adv Prev Med	Gongal G	2011	0	0	0	0	0	0	0	0	0	Adv Prev Med. 2011;2011:383870. Epub 2011 Sep 21.	40829	Yes
21991447	Recent advances in prevention and control of rabies.	Madhusudana SN, Briggs D, Bourhy H.	Adv Prev Med	Madhusudana SN	2011	0	0	0	0	0	0	0	0	0	Adv Prev Med. 2011;2011:956428. Epub 2011 Sep 26. No abstract available.	40829	Yes
22116291	Reviewing host proteins of Rhabdoviridae: Possible leads for lesser studied viruses.	Guleria A, Kiranmayi M, Sreejith R, Kumar K, Sharma SK, Gupta S.	J Biosci	Guleria A	2011	0	0	0	0	0	0	0	0	0	J Biosci. 2011 Dec;36(5):929-37.	40873	Yes
